# Supplementary material
Source: PubMed Central journal article supplement (PMC6392429)
Supplement: NIHMS991413-supplement.pdf [file NIHMS991413-supplement.pdf]

**Title: Discovery of Immunologically Inspired Small Molecules  
That Target the Viral Envelope Protein**

**Authors:** Wenlong Lian<sup>a</sup>, Jaebong Jang<sup>b</sup>, Supanee Potisophon<sup>a,c</sup>, Pi-Chun Li<sup>b</sup>,  
Amal Rahmeh<sup>a,c</sup>, Jinhua Wang<sup>b</sup>, Nicholas P. Kwiatkowski<sup>b</sup>, Nathanael S.  
Gray<sup>b</sup>, Priscilla L. Yang<sup>a\*</sup>.

**Affiliations:**

<sup>a</sup> Department of Microbiology and Immunobiology, Harvard Medical School.

<sup>b</sup> Department of Biological Chemistry and Molecular Pharmacology, Harvard Medical School and Department of Cancer Biology, Dana-Farber Cancer Institute.

<sup>c</sup> Current addresses: S.P., Bioaster, 40 Avenue Tony Garnier, 69007, Lyon, France; A.R., Department of Biology, American University of Beirut, Beirut, Lebanon.

## Supporting Information Table of Contents

|                                                                                                            |      |
|------------------------------------------------------------------------------------------------------------|------|
| Figure S1. Development and optimization of the competitive proximity luminescence assay .....              | S3   |
| Figure S2. Quantification of antiviral IC <sub>90</sub> values against DENV2 .....                         | S4   |
| Figure S3. Affinity measurements for K786-9739 with sE and sE-M196V.....                                   | S5   |
| Figure S4. SAR studies of C200-5340 and K786-9739.....                                                     | S6-7 |
| Figure S5. Antiviral activity measured against representative dengue 1, 2, 3, and 4 and Zika viruses ..... | S8   |
| Table S1. Initial assessment of antiviral activity .....                                                   | S9   |
| Scheme S1. Synthetic of JW-068.....                                                                        | S10  |
| REFERENCES for SUPPORTING INFORMATION.....                                                                 | S11  |

**Figure S1. Development and optimization of the competitive proximity luminescence assay.** **a, left**, Cross-titration of recombinant, soluble DENV2 prefusion E dimer (DENV2 sE<sub>2</sub>) with **GNF2-biotin**. Titratable signal was observed at 200 and 300 nM **GNF2-biotin** with signal plateauing for both probe concentrations at 50-100 nM sE<sub>2</sub>. **right**, 10 μM of **3-110-22**, a known inhibitor of DENV2 E with K<sub>D</sub> DENV2 sE<sub>2</sub> 0.6 ± 0.2 μM<sup>1</sup>, was used as a positive control to compete with 300 nM **GNF2-biotin** for binding to sE<sub>2</sub>. Competition was observed at concentrations of sE<sub>2</sub> between 50 and 150 nM with optimal signal-to-background observed for 300 nM **GNF2-biotin** and 100 nM sE<sub>2</sub>. **b**, Dose-response curves for positive control **3-110-22** (**left**) and negative control **JW-068** (**right**) in the competitive proximity luminescence assay using optimized conditions of 100 nM sE<sub>2</sub> and 300 nM **GNF2-biotin** in the presence of 0.3 or 0.6% DMSO. Data were fit by non-linear regression analysis. The signal-to-background and competition in the assay were the same at both DMSO concentrations tested. For our HTS and SAR experiments, the assay was performed with a constant concentration of 0.22% DMSO (vol/vol). **c**, The order of addition of reagents was varied to test the sequences depicted. For each set of reactions, we calculated the signal-to-background (S/B) in the absence of competitor (**left**) and the percent signal inhibition by 10 μM **3-110-22** (**right**). Approaches i and ii exhibited superior S/B; approach i was chosen for our experiments since addition of **GNF2-biotin** with the acceptor beads and protein was simpler than sequential addition of each of these reagents as in approach ii. **d**, Structure of **JW-068** and biolayer interferometry data showing that **JW-068** does not bind to DENV2 sE<sub>2</sub>. Representative data are shown for n = 4 experiments. **3-110-22** was used as a positive control DENV2 sE<sub>2</sub>.

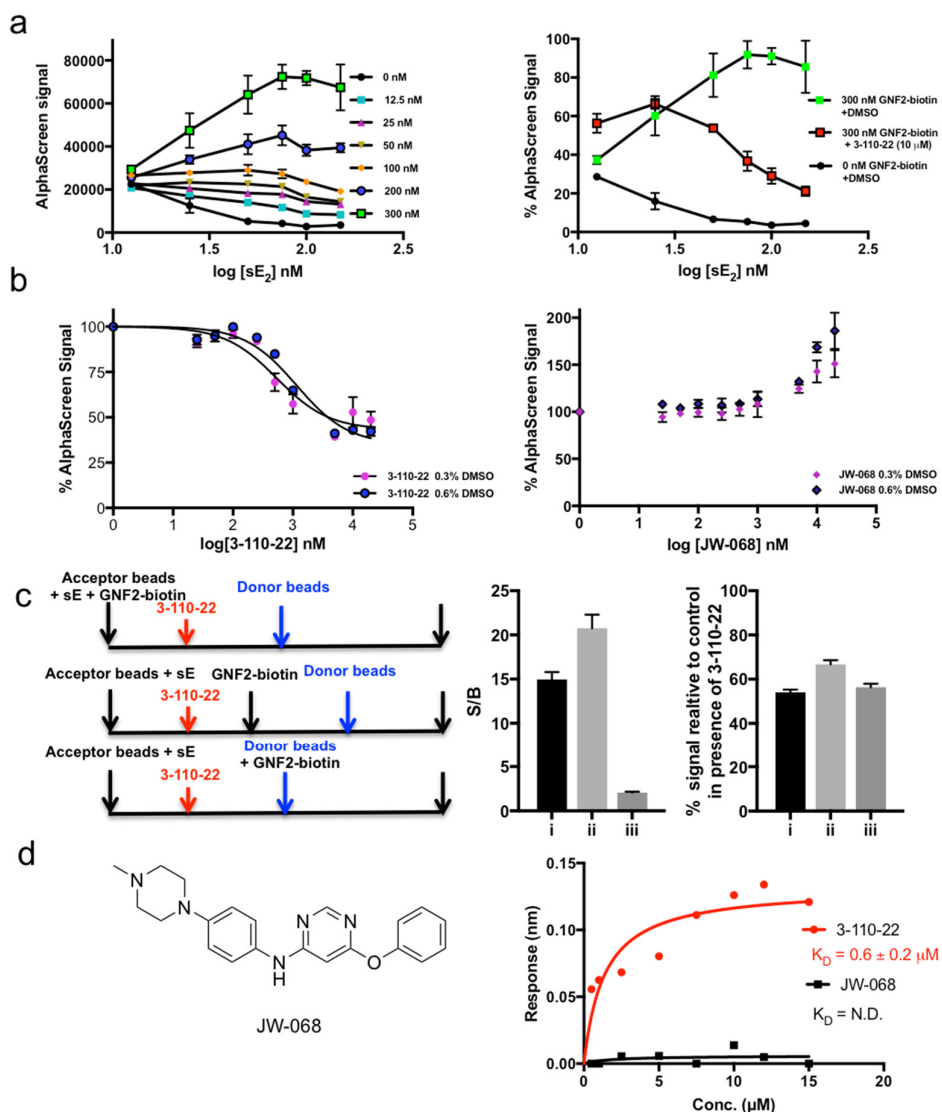

**Figure S2. Quantification of antiviral IC<sub>90</sub> values against DENV2.** Antiviral activity against DENV2 was evaluated using the viral infectivity assay depicted in Figure 1d. Inhibitor-treatment was limited to a 45 minute pre-incubation with the viral inoculum and during the one-hour infection of cells. After this, all extracellular compound and virus were washed away, and the cells were overlaid with fresh medium. Single-cycle yield was quantified by viral plaque formation assay as a metric of successful viral entry 20-24 hours prior. IC<sub>90</sub> values--defined as the concentration of inhibitor required to reduce single-cycle DENV2 viral yield by 10-fold in the infectivity assay -- were determined by non-linear regression analysis of the data. IC<sub>90</sub> values reported in Table 1 are the average of two or more independent experiments. Representative experiments are shown below.

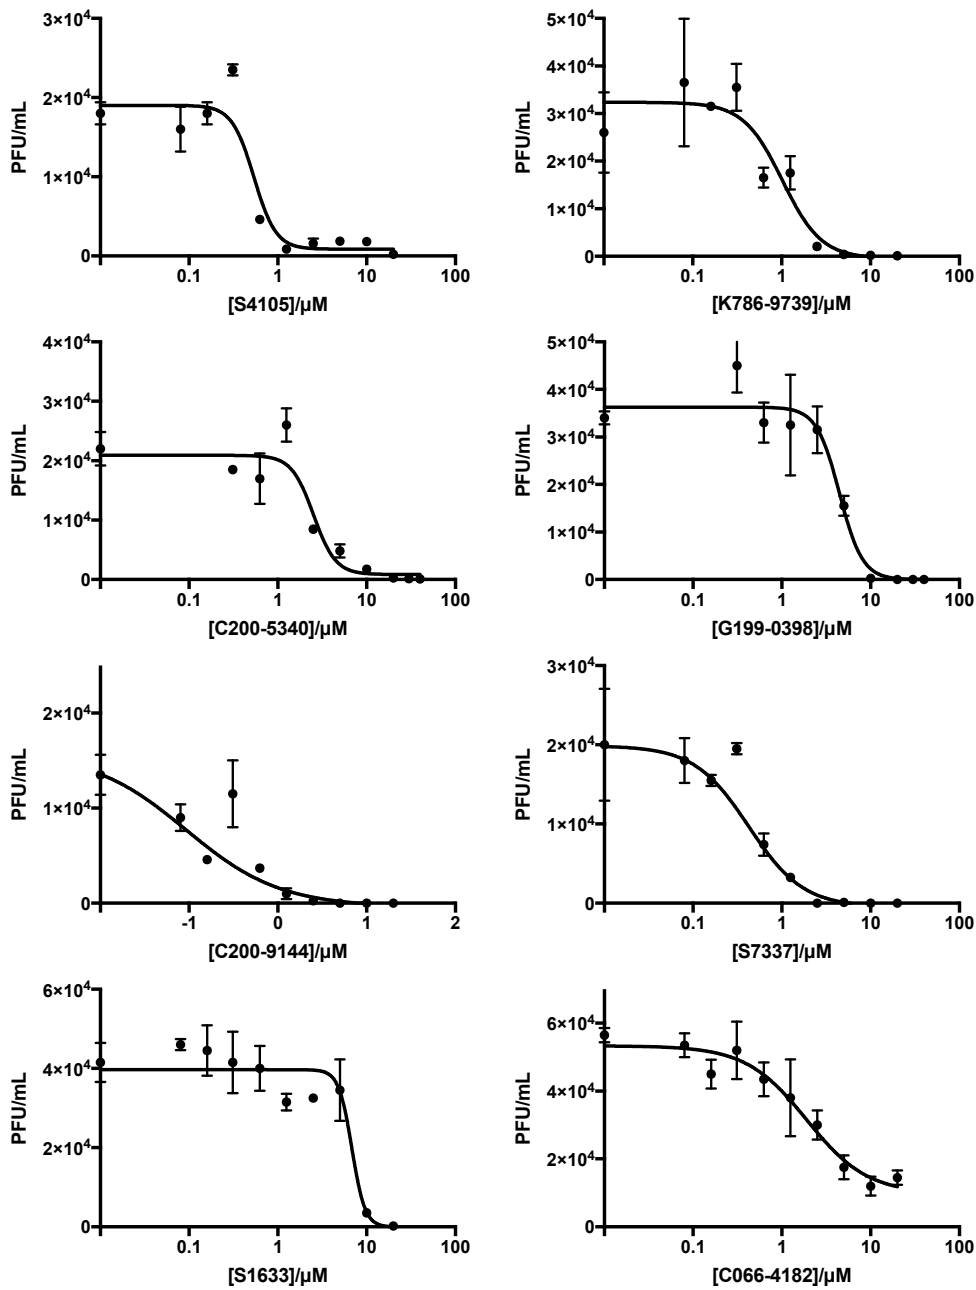

**Figure S3. Affinity measurements for K786-9739 with recombinant, soluble E-WT and E-M196V dimer protein.**  $K_D$  values for K786-9739's interaction with DENV2 recombinant, soluble sE<sub>2</sub>-WT (E-WT) and sE<sub>2</sub>-M196V (E-M196V) proteins were determined by biolayer interferometry. Representative data for one experiment are shown with the average and standard deviation for  $n \geq 2$  independent experiments presented in the figure legend.

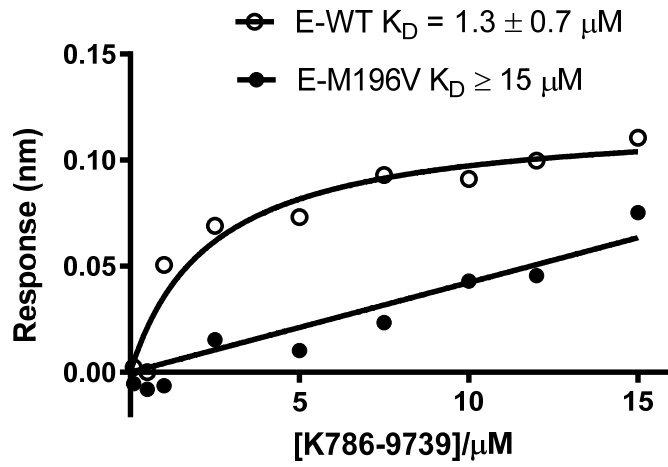

**Figure S4 SAR studies of C200-5340 and K786-9739.** The competitive proximity luminescence assay was performed with 300 nM **GNF2-biotin** and 200 nM recombinant DENV2 DI-DII protein in HEPES buffer (25 mM HEPES, 200 mM NaCl, pH 7.4) with 0.22% DMSO. IC<sub>50</sub> values -- defined as the concentration of small molecule required to reduce luminescence in the assay by 50% -- were determined by nonlinear regression analysis. IC<sub>50</sub> values for parental compounds identified in the HTS primary screen are in red and represent the average and standard deviation of 3 independent experiments. Analogs for each SAR study are shown in black; IC<sub>50</sub> values represent the curve fit of duplicate samples. **a. C200-5340 study. b. K786-9739 study.**

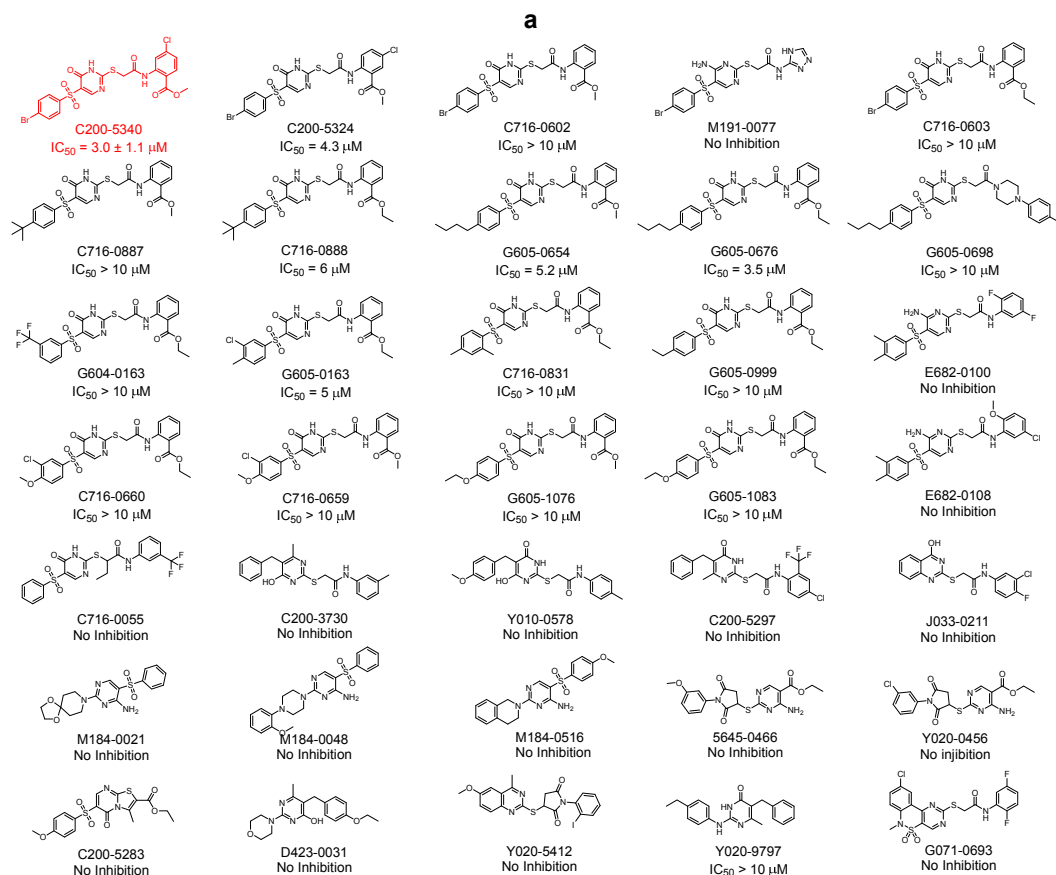

**Figure S4 SAR studies of C200-5340 and K786-9739. Cont'd**

**b**

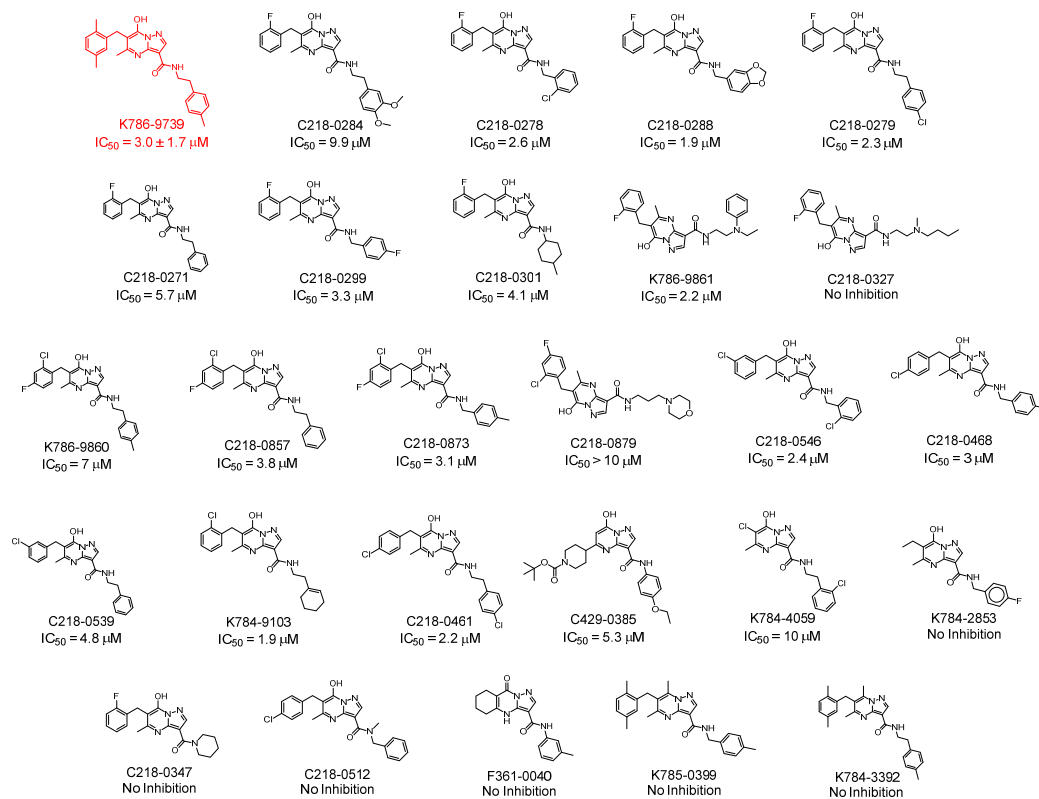

**Figure S5. Antiviral activity measured against dengue 1, 2, 3, and 4 and Zika viruses.** Antiviral activity was measured using the plaque reduction assay as outlined in Figure 1d. Briefly, inhibitor-treatment was limited to a 45 minute pre-incubation with the viral inoculum and during the one-hour infection of cells. After this, all extracellular compound and virus were washed away, and the cells were overlaid with carboxymethylcellulose-containing medium to allow formation of viral plaques. The percentage of plaque reduction was calculated as  $100 - (\text{number of plaques}_{\text{inhibitor-treated}} / \text{number of plaques}_{\text{DMSO-treated}}) * 100$  and is plotted versus the  $\log_{10}$  concentration of inhibitor. PRNT<sub>50</sub> values, defined as the concentration to cause 50% reduction in the number of plaques, were determined by empirical analysis of data from two or more independent experiments and are reported in Table 4. Representative data are shown below.

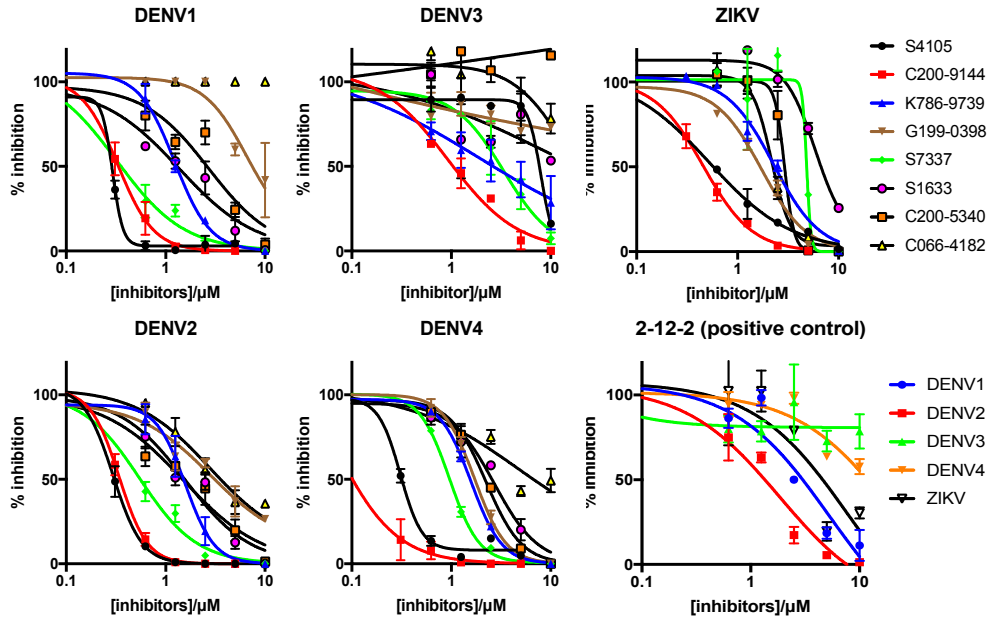



**Table S1. Initial assessment of antiviral activity.** The antiviral activity of compounds identified by HTS was initially assessed at two concentrations (3 and 10  $\mu\text{M}$ ) using the viral infectivity assay depicted in Figure 1d. Activity is reported as percent inhibition (% inhibition) defined as  $100 - (\text{single-cycle viral yield}_{\text{inhibitor-treated}} / \text{single-cycle viral yield}_{\text{DMSO-treated}}) * 100$ . Values represent the average and standard deviation of 2 or more independent replicates. The eight compounds exhibiting the greatest antiviral activity were chosen for further characterization, including  $\text{IC}_{90}$  value determination (see Figure 1c for a flow chart of the screening progression). The structures of the four compounds not advanced for further study are shown here.

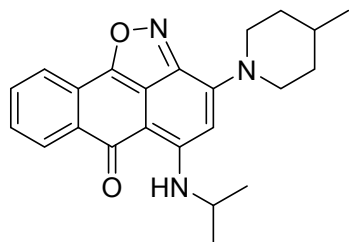

C620-0273

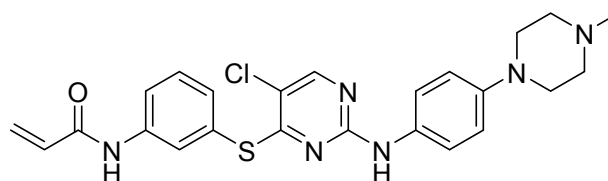

S1179

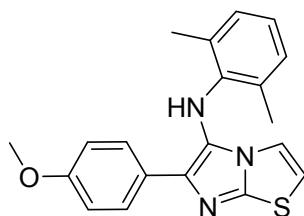

C239-0224

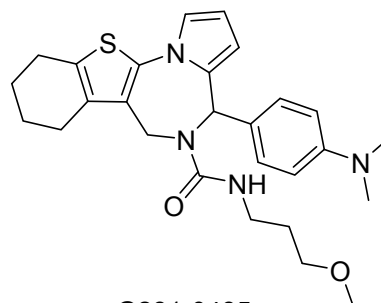

G281-0485

| Compounds | % inhibition vs. DENV2 |                     |
|-----------|------------------------|---------------------|
|           | at 3 $\mu\text{M}$     | at 10 $\mu\text{M}$ |
| C200-5340 | 40 $\pm$ 5             | 90 $\pm$ 5          |
| G199-0398 | 60 $\pm$ 10            | 90 $\pm$ 5          |
| G281-0485 | 65 $\pm$ 5             | 75 $\pm$ 2          |
| K786-9739 | $\geq$ 99              | $\geq$ 99           |
| S4105     | 60 $\pm$ 30            | $\geq$ 99           |
| S1179     | 35 $\pm$ 20            | 80 $\pm$ 5          |
| C066-4182 | 45 $\pm$ 5             | 80 $\pm$ 5          |
| S1633     | 70 $\pm$ 10            | 90 $\pm$ 0          |
| C620-0273 | 80 $\pm$ 10            | 90 $\pm$ 5          |
| S7337     | $\geq$ 99              | $\geq$ 99           |
| C200-9144 | $\geq$ 99              | $\geq$ 99           |
| C239-0224 | 25 $\pm$ 15            | 70 $\pm$ 2          |

**Scheme S1. Synthetic of JW-068.** <sup>a</sup> Reagents and conditions: a) 4-(4-methylpiperazin-1-yl)aniline, TFA, 2-butanol, 110 °C, 4h.

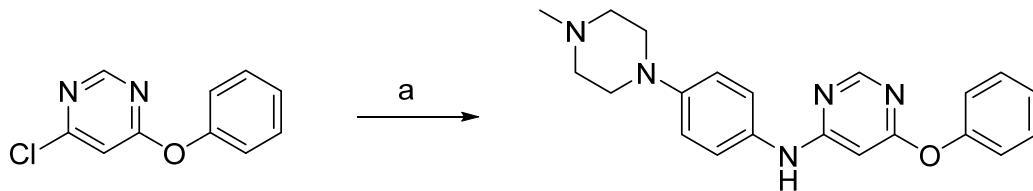

## REFERENCES

1. de Wispelaere, M.; Lian, W.; Potisophon, S.; Li, P-C.; Jang, J.; Ficarro, S.; Clark, M. J.; Zhu, X.; Kaplan, J. B.; Pitts, J. D.; Wales, T. E.; Engen, J. R.; Marto, J.; Gray, N. S.; Yang, P. L. (2018) Inhibition of flaviviruses by targeting a conserved pocket on the viral envelope protein. *Cell Chem. Biol.* In press. DOI: 10.1016/j.chembiol.2018.05.011.
